# Supplementary material
Source: PubMed Central journal article supplement (PMC2519805)

## Supporting Information

**Figure 1supp:** *DNA lengthening due to binding of  $Ru(phen)_2dppx^{2+}$ .* Histograms of DNA length are shown for five ruthenium concentrations: (a) 750 nM Ru, or 1:1 Ru:base pairs (b) 3.0  $\mu$ M Ru, or 4:1 Ru:base pairs (c) 6  $\mu$ M, or 8:1 Ru:base pairs (d) 9.0  $\mu$ M or 12:1 Ru:base pairs (e) 15 $\mu$ M or 20:1 Ru:base pairs. The DNA concentration is 750 nM base pairs in all cases. The mean measured length of the DNA molecules alone is  $1.43 \pm 0.03$   $\mu$ m (black arrow).

**Figure 2supp:** *DNA lengthening due to binding of  $Ru(phen)_2dpq^{2+}$ .* Characteristic AFM images and histograms of DNA length are shown for five ruthenium concentrations: (a) 750 nM Ru, or 1:1 Ru:base pairs (b) 3.0  $\mu$ M Ru, or 4:1 Ru:base pairs (c) 6  $\mu$ M, or 8:1 Ru:base pairs (d) 9.0  $\mu$ M or 12:1 Ru:base pairs (e) 15 $\mu$ M or 20:1 Ru:base pairs.

**Figure 3supp:** *DNA lengthening due to intercalative binding by  $Ru(phen)_3^{2+}$ .* Characteristic AFM images and histograms of DNA length are shown for five ruthenium concentrations: (a) 750 nM Ru, or 1:1 Ru:base pairs (b) 1.5  $\mu$ M Ru, or 2:1 Ru:base pairs (c) 7.5  $\mu$ M or 10:1 Ru:base pairs (d) 19  $\mu$ M, or 25:1 Ru:base pairs; (e) 37.5  $\mu$ M, or 50:1 Ru:base pairs.

**Figure 4supp:** *DNA lengthening due to binding of  $Ru(bpy)_3^{2+}$ .* Characteristic AFM images and histograms of DNA length are shown for five ruthenium concentrations: (a)

750 nM Ru, or 1:1 Ru:base pairs (b) 3.0  $\mu$ M Ru, or 4:1 Ru:base pairs (c) 9.0  $\mu$ M or 12:1 Ru:base pairs (d) 15  $\mu$ M, or 20:1 Ru:base pairs.

**Figure 1supp**

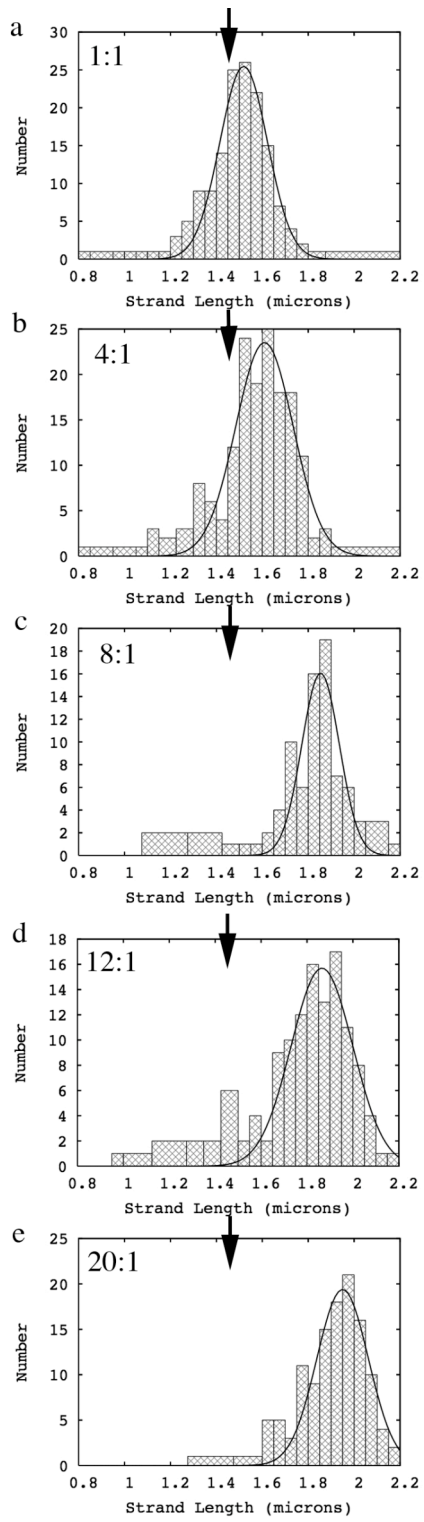

**Figure 2supp**

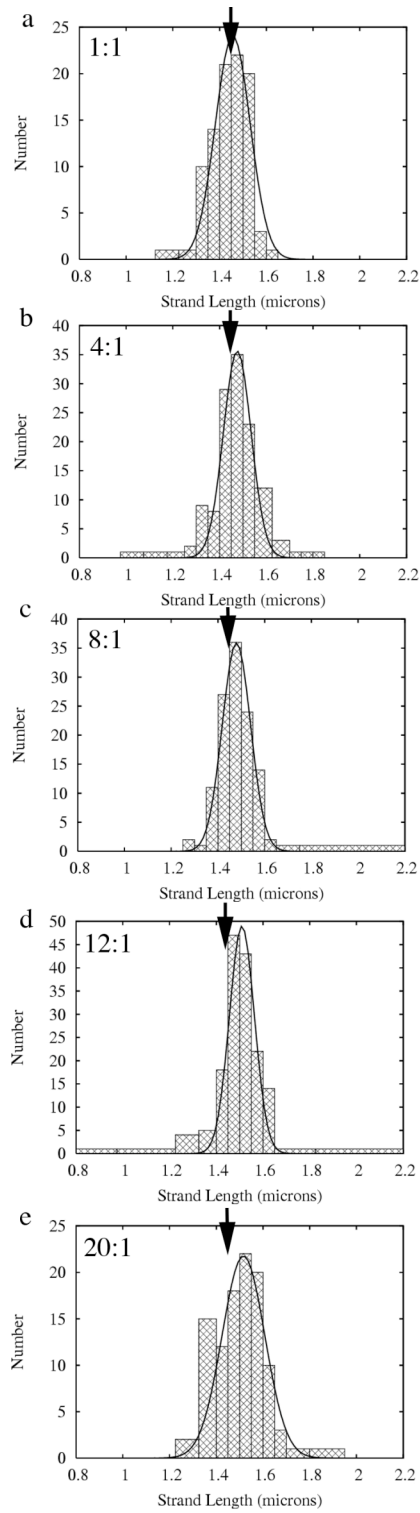

**Figure 3supp**

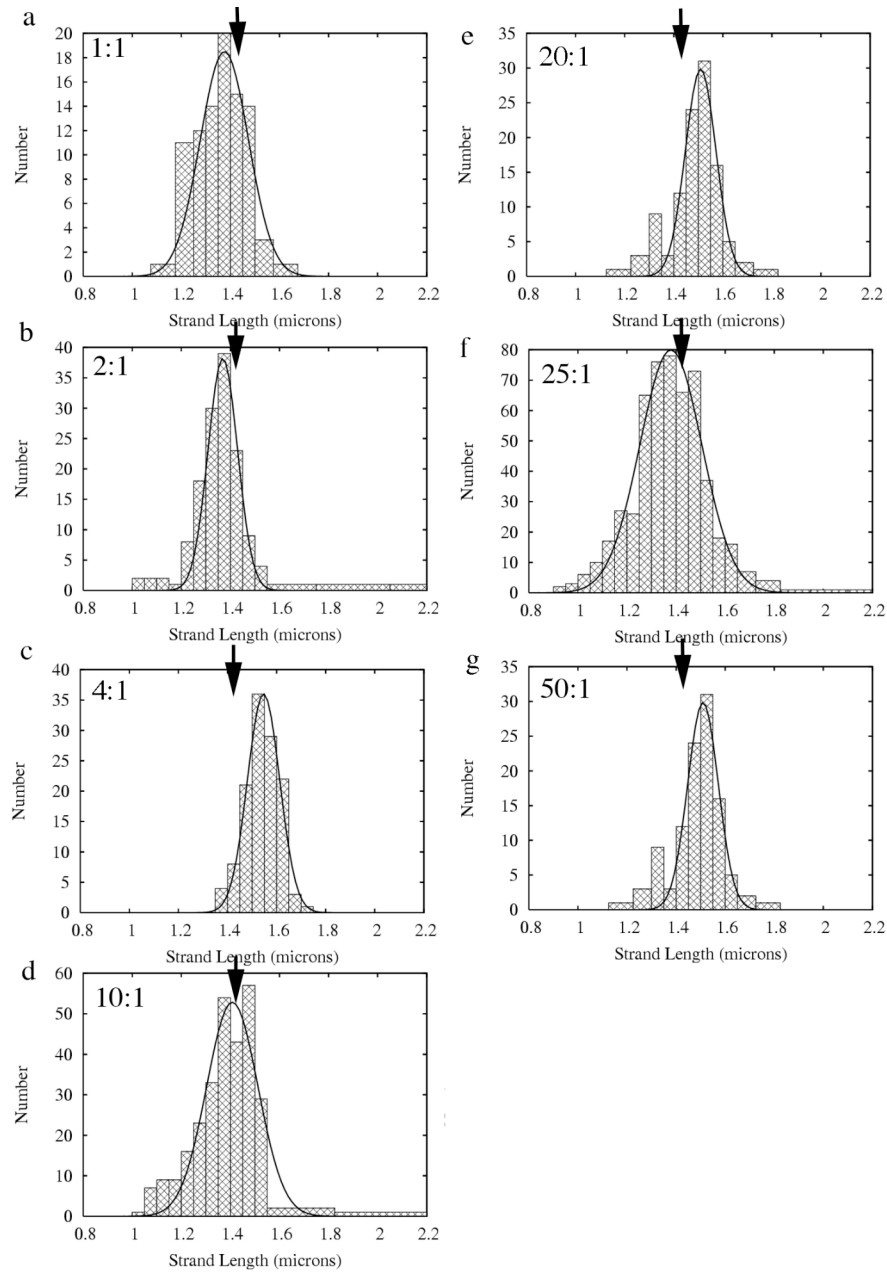

**Figure 4supp**

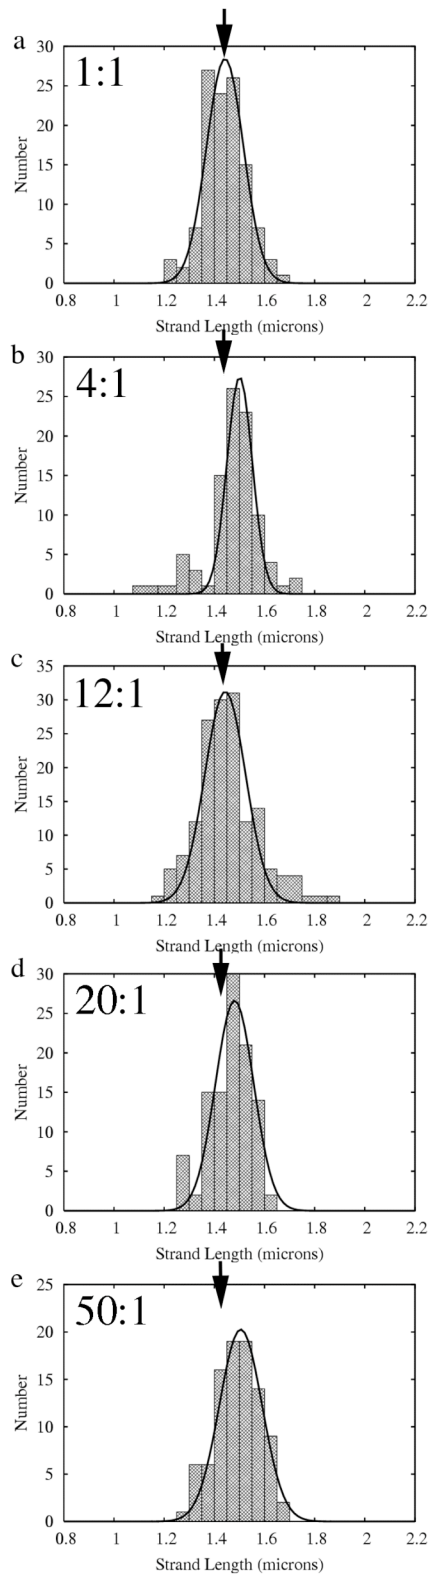

Supplement: NIHMS61010-supplement-si20051125_035.pdf [file NIHMS61010-supplement-si20051125_035.pdf]
